# Supplementary material for: The Comparison of the Kidney Effects of Dipeptidyl Peptidase 4 Inhibitors and Glucagon-Like Peptide 1 Agonist-Administered Concomitant with Sodium-Glucose Cotransporter 2 Inhibitors in Japanese Patients with Type 2 Diabetes Mellitus and Chronic Kidney Disease
Source: Hindawi journal article supplement (doi:10.1155/2021/6573369), 2021-12-21

**FIGURE S1** Histogram of propensity score before and after matching

**a) Before propensity score matching**

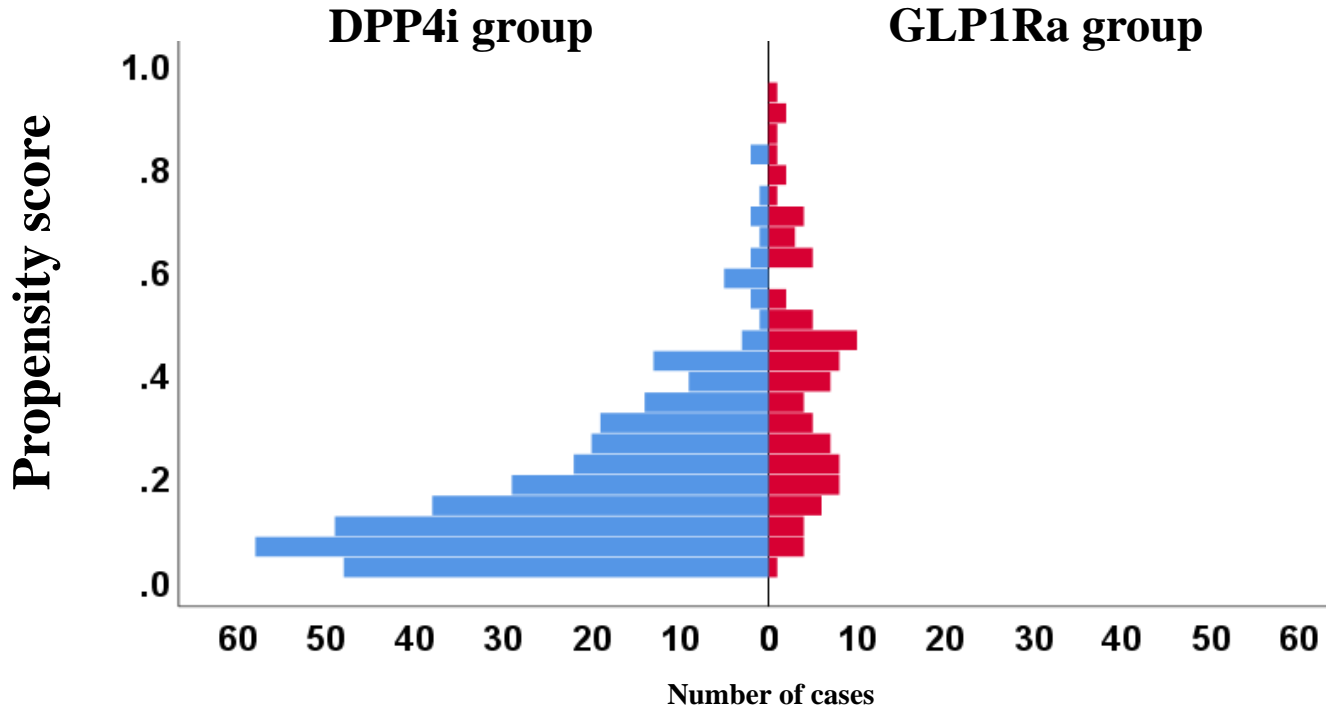

**b) After propensity score matching**

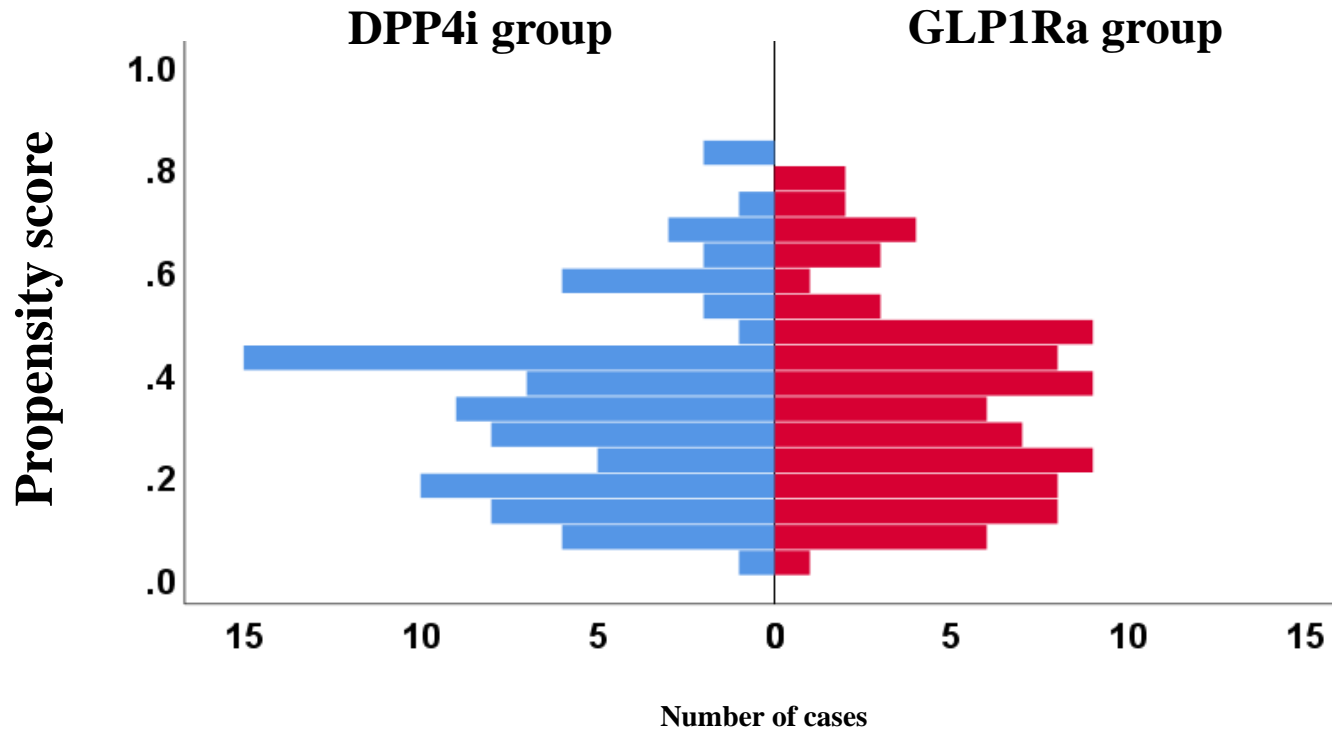

Supplement: f1 [file 6573369.f1.pdf]
